# Supplementary material for: Duodenojejunal Omega Switch Surgery Reduces Oxidative Stress Induced by Cafeteria Diet in Sprague-Dawley Rats
Source: MDPI journal article supplement (doi:10.3390/nu14194097), 2022-10-02
Supplement: s1 [file s1]

# Duodenojejunal Omega Switch Surgery Reduces Oxidative Stress Induced by Cafeteria Diet in Sprague-Dawley Rats

Jakub Poloczek <sup>1,2</sup>, Wojciech Kazura <sup>3</sup>, Elżbieta Chelmecka <sup>4</sup>, Katarzyna Michalczyk <sup>3</sup>, Jerzy Jochem <sup>3</sup>, Janusz Gumprecht <sup>2</sup> and Dominika Stygar <sup>3,\*</sup>

**Table S1.** Levels of antioxidant and lipid peroxidation markers in the plasma of Sprague-Dawley rats subjected to duodenojejunal omega switch (DJOS) and control (SHAM) surgery and different dietary protocols at 8 weeks after the surgery. The data are presented as median and interquartile range, Me (Q1-Q3).

| Parameter                        | Surgery | Dietary protocols |                  |                  |                  |
|----------------------------------|---------|-------------------|------------------|------------------|------------------|
|                                  |         | CD/CD             | CD/HFS           | HFS/CD           | HFS/HFS          |
| SOD activity [NU/mg]             | DJOS    | 22.4 (22.3-22.4)  | 24.8 (24.6-24.9) | 22.3 (22.8-23.5) | 20.5 (20.3-20.6) |
|                                  | SHAM    | 29.4 (29.1-29.7)  | 25.9 (25.3-26.5) | 25.9 (25.4-26.1) | 28.2 (27.7-28.5) |
| CER activity [mg/dL]             | DJOS    | 22.4 (22.2-22.5)  | 45.4 (43.7-46.6) | 30.5 (30.4-30.8) | 25.6 (25.5-25.7) |
|                                  | SHAM    | 25.6 (25.3-26.8)  | 48.4 (48.2-48.5) | 34.7 (34.6-35.0) | 55.5 (55.3-55.7) |
| TAC level [mmol/L]               | DJOS    | 0.86 (0.86-0.88)  | 0.51 (0.51-0.52) | 0.57 (0.57-0.59) | 0.65 (0.65-0.65) |
|                                  | SHAM    | 0.86 (0.84-0.87)  | 0.37 (0.31-0.39) | 0.46 (0.43-0.49) | 0.28 (0.27-0.29) |
| MDA concentration [ $\mu$ mol/L] | DJOS    | 2.3 (2.2-2.4)     | 4.8 (4.7-4.9)    | 4.2 (4.2-4.3)    | 3.6 (3.4-3.8)    |
|                                  | SHAM    | 2.7 (2.5-2.8)     | 5.5 (5.2-5.6)    | 5.5 (5.3-5.7)    | 3.5 (3.4-3.6)    |
| LS concentration [RF]            | DJOS    | 33.5 (32.6-36.0)  | 76.4 (76.3-76.6) | 58.1 (58.0-58.5) | 75.4 (75.2-75.7) |
|                                  | SHAM    | 54.7 (54.2-54.9)  | 99.4 (99.3-99.5) | 82.3 (82.1-82.4) | 96.8 (96.3-98.2) |

Legend: CD – control diet, CER – cerulopasmin, DJOS – duodenojejunal omega switch surgery, HFS – high fat/high sugar diet, LS – lipofuscin, MDA – malondialdehyde, NU – nitrate units, RF – relative lipid extract fluorescence, SHAM – control surgery, SOD – superoxide dismutase, TAC – total antioxidant capacity.

**Table S2.** The significance level for multiple comparisons in non-parametric Kruskal-Wallis analysis of antioxidant and lipid peroxidation markers in the plasma of Sprague-Dawley rats subjected to duodenojejunal omega switch (DJOS) and control (SHAM) surgery and different dietary protocols at 8 weeks after the surgery.

| Parameter | Surgery | p <sub>CD/CD</sub> vs<br>p <sub>CD/HFS</sub> | p <sub>CD/CD</sub> vs<br>p <sub>HFS/CD</sub> | p <sub>CD/CD</sub> vs<br>p <sub>HFS/HFS</sub> | p <sub>CD/HFS</sub><br>vs<br>p <sub>HFS/CD</sub> | p <sub>CD/HFS</sub><br>vs p <sub>HFS/CF</sub> | p <sub>HFS/CD</sub> vs<br>p <sub>HFS/HFS</sub> |
|-----------|---------|----------------------------------------------|----------------------------------------------|-----------------------------------------------|--------------------------------------------------|-----------------------------------------------|------------------------------------------------|
| SOD       | DJOS    | < 0.05                                       | 1                                            | 0.724                                         | 0.724                                            | < 0.001                                       | < 0.05                                         |
|           | SHAM    | < 0.01                                       | < 0.01                                       | 0.849                                         | 1                                                | 0.164                                         | 0.164                                          |
| CER       | DJOS    | < 0.001                                      | < 0.05                                       | 0.849                                         | 0.849                                            | < 0.05                                        | 0.849                                          |
|           | SHAM    | < 0.01                                       | 0.849                                        | < 0.001                                       | 0.849                                            | 0.849                                         | < 0.05                                         |
| TAC       | DJOS    | < 0.001                                      | < 0.05                                       | 0.849                                         | 0.849                                            | < 0.05                                        | 0.849                                          |
|           | SHAM    | < 0.05                                       | 0.849                                        | < 0.001                                       | 0.849                                            | 0.849                                         | < 0.05                                         |
| MDA       | DJOS    | < 0.001                                      | < 0.05                                       | 0.849                                         | 1                                                | < 0.05                                        | 0.724                                          |
|           | SHAM    | < 0.01                                       | < 0.01                                       | 0.849                                         | 1                                                | 0.202                                         | 0.133                                          |
| LS        | DJOS    | < 0.001                                      | 0.849                                        | < 0.05                                        | < 0.05                                           | 0.849                                         | 0.849                                          |
|           | SHAM    | < 0.001                                      | 0.849                                        | < 0.05                                        | < 0.05                                           | 0.990                                         | 0.785                                          |

Legend: CD – control diet, CD/CD – rats fed with CD before and after the surgery, CD/HFS – rats fed with CD before and HFS diet after the surgery, CER – ceruloplasmin activity, DJOS – duodenojejunal omega switch surgery, HFS – high fat/high sugar diet, HFS/CD – rats fed with HFS diet before and CD after the surgery, HFS/HFS – rats fed with HFS diet before and after the surgery, LS – lipofuscin concentration, MDA – malondialdehyde concentration, SHAM – control surgery, SOD – superoxide dismutase activity, TAC – total antioxidant capacity.
